# Supplementary material for: Discovery of Diverse Natural Products as Inhibitors of SARS-CoV-2 Mpro Protease through Virtual Screening
Source: PubMed Central journal article supplement (PMC9931176; doi:10.1021/acs.jcim.1c00951), 2021-11-22
Supplement: ci1c00951_si_001.pdf [file ci1c00951_si_001.pdf]

## Supporting information

### Discovery of Diverse Natural Products as inhibitors of SARS-CoV-2 M<sup>pro</sup> Protease through Virtual Screening

Jaime Rubio-Martínez<sup>1\*</sup>, Ana Jiménez-Alesanco<sup>2,3</sup>, Laura Ceballos-Laita<sup>2,4</sup>, David Ortega-Alarcón<sup>2,3</sup>, Sonia Vega<sup>2</sup>, Cristina Calvo<sup>5,6</sup>, Cristina Benítez<sup>5,6</sup>, Olga Abian<sup>2,3,4,5,7</sup>, Adrián Velázquez-Campoy<sup>2,3,4,5,8</sup>, Timothy Thomson<sup>5,6,9</sup>, José Manuel Granadino-Roldán<sup>10</sup>, Patricia Gómez-Gutiérrez<sup>11</sup>, Juan J. Pérez<sup>11</sup>.

<sup>1</sup>Department of Materials Science and Physical Chemistry, University of Barcelona and the Institut de Recerca en Química Teorica i Computacional (IQTCUB), 08028 Barcelona, Spain

<sup>2</sup>Institute for Biocomputation and Physics of Complex Systems (BIFI), Joint Units IQFR-CSIC-BIFI, and GBsC-CSIC-BIFI, Universidad de Zaragoza, 50018 Zaragoza, Spain

<sup>3</sup>Departamento de Bioquímica y Biología Molecular y Celular, Universidad de Zaragoza, 50009 Zaragoza, Spain

<sup>4</sup>Instituto de Investigación Sanitaria de Aragón (IIS Aragon), 50009 Zaragoza, Spain

<sup>5</sup>Centro de Investigación Biomédica en Red en el Área Temática de Enfermedades Hepáticas Digestivas (CIBERehd), 28029 Madrid, Spain

<sup>7</sup>Instituto Aragonés de Ciencias de la Salud (IACS), 50009 Zaragoza, Spain.

<sup>6</sup>Institute of Molecular Biology of Barcelona (IBMB-CSIC), 08028 Barcelona, Spain

<sup>8</sup>Fundación ARAID, Gobierno de Aragón, 50018 Zaragoza, Spain

<sup>9</sup>Universidad Peruana Cayetano Heredia, San Martín de Porres 15102, Perú.

<sup>10</sup>Departamento de Química Física y Analítica, Facultad de Ciencias Experimentales, Universidad de Jaén, Campus "Las Lagunillas" s/n, 23071, Jaén, Spain

<sup>11</sup>Department of Chemical Engineering. Universitat Politècnica de Catalunya- Barcelona Tech. Av. Diagonal, 647. 08028 Barcelona, Spain

**cMD dyn\_1**

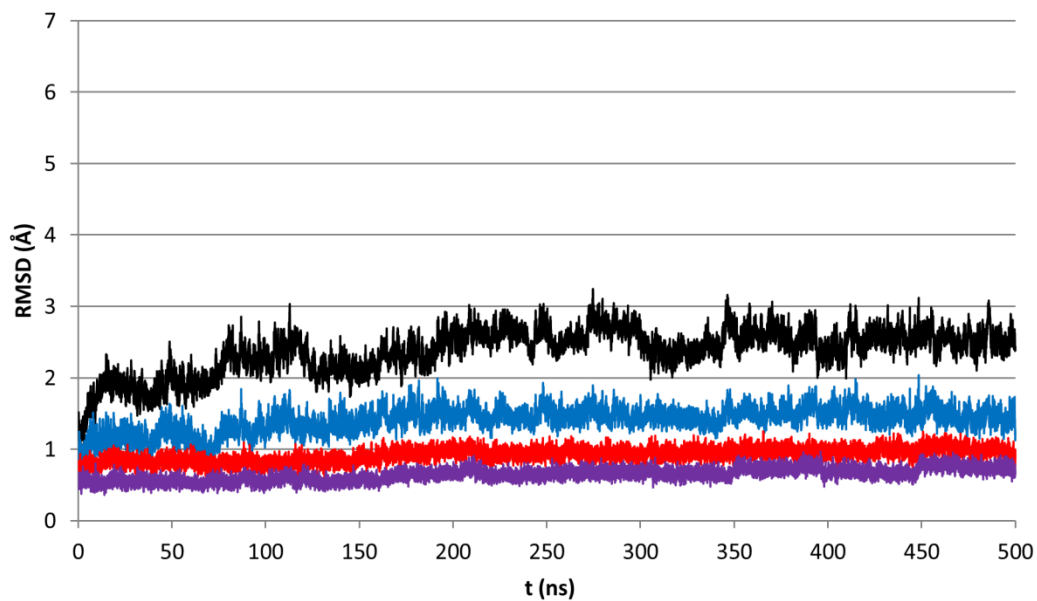

**cMD dyn\_2**

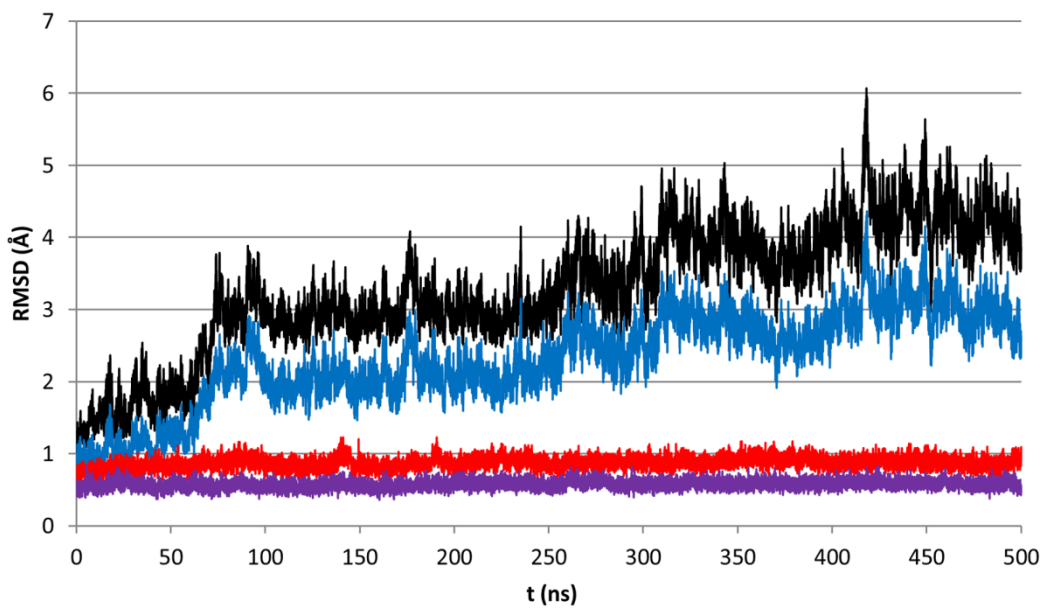

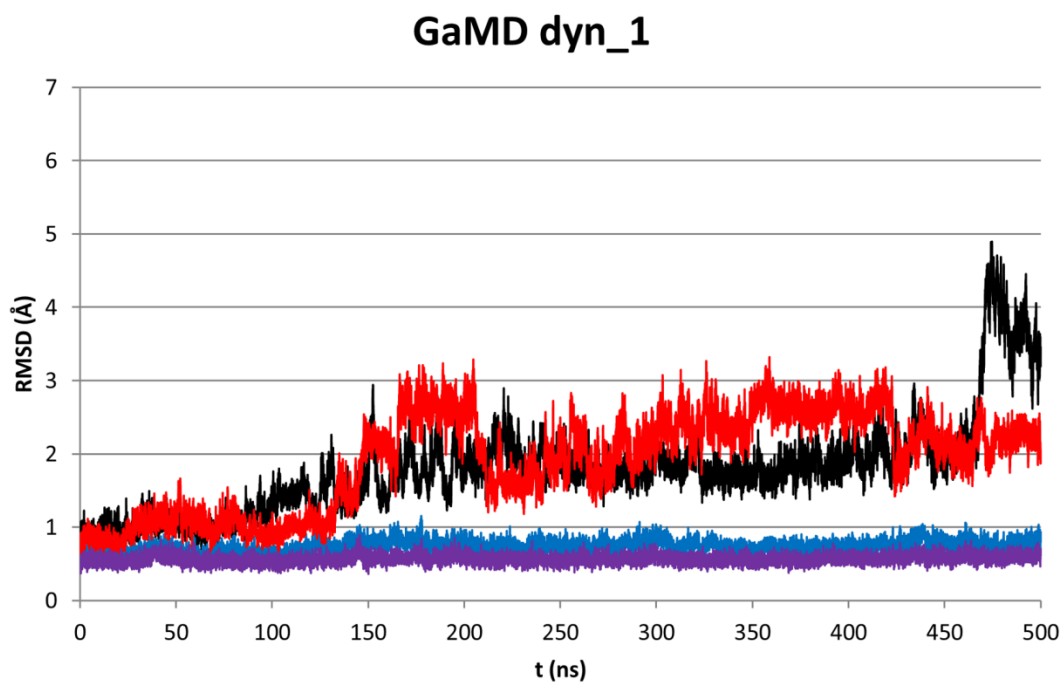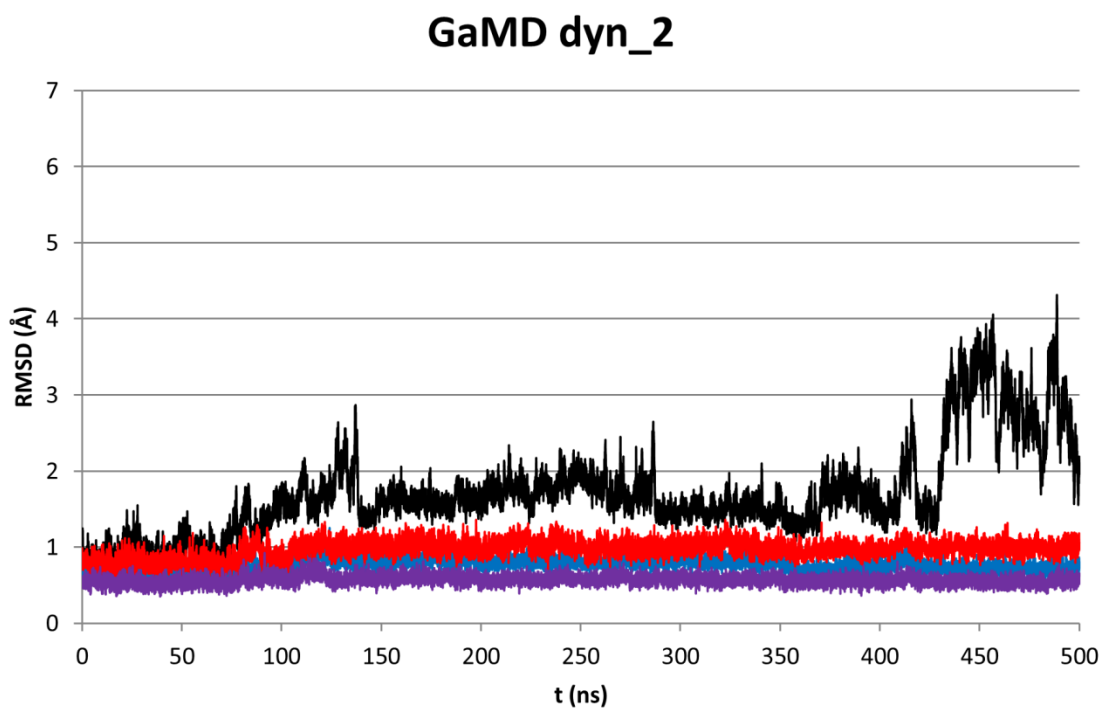

Figure S1. RMSD time evolution for each of the four steps (in different colors) used to determine protein residues with smallest RMSF. Black represents the first step, red represents the second step, blue represents the third and magenta fourth steps respectively.

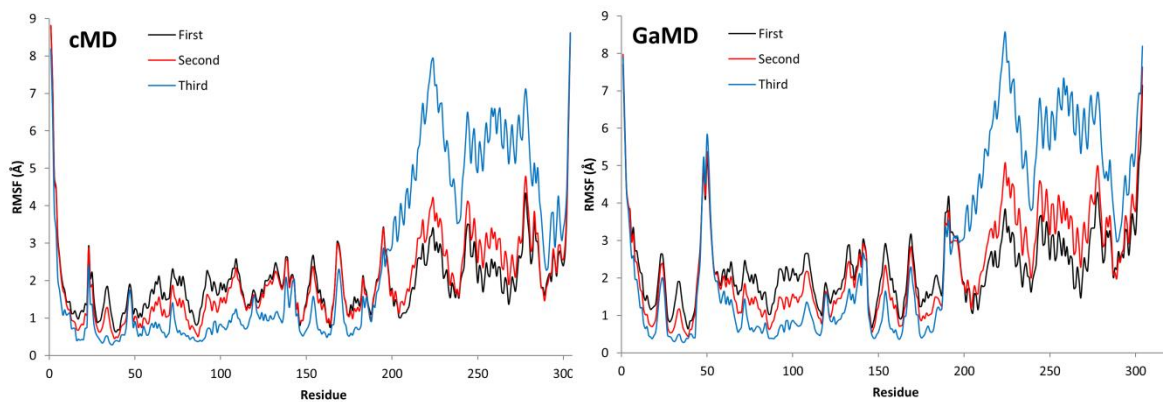

Figure S2. Variation of the RMSF with time for each of the steps used to determine protein residues with smallest RMSF.

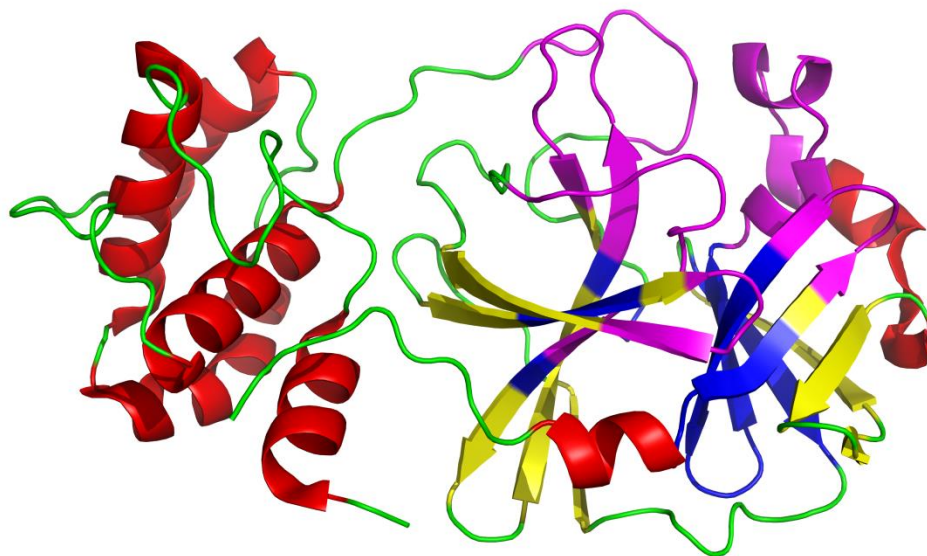

Figure S3. SARS-CoV-2 M<sup>pro</sup> protease. Residues used to superpose the structures (low mobility) are depicted in blue. Residues used to do the clustering process and PC analysis (big mobility) are depicted in magenta.

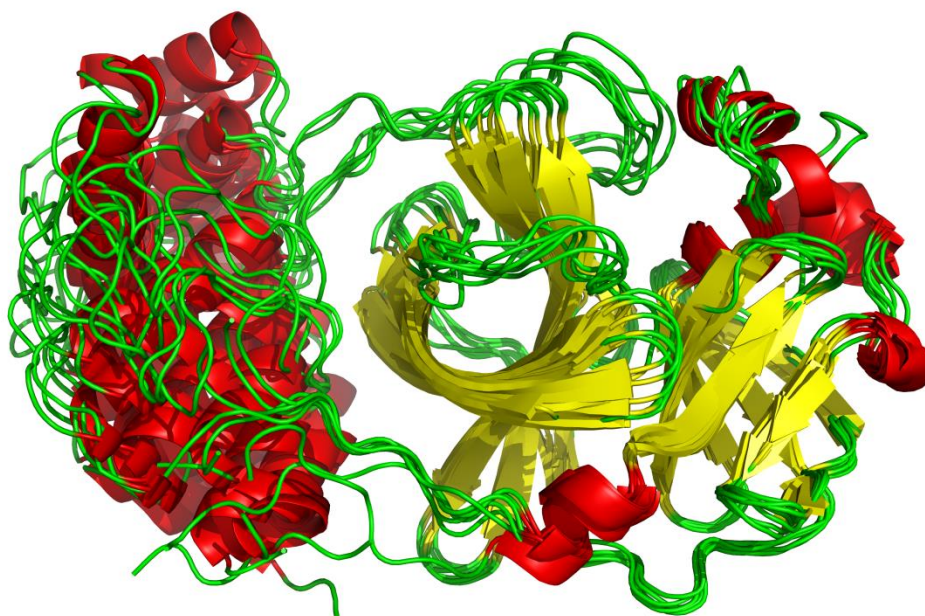

Figure S4. SARS-CoV-2 M<sup>pro</sup> protease. Superposition of all seven representative structures using the binding site C<sub>α</sub> with lowest RMSF as reference.

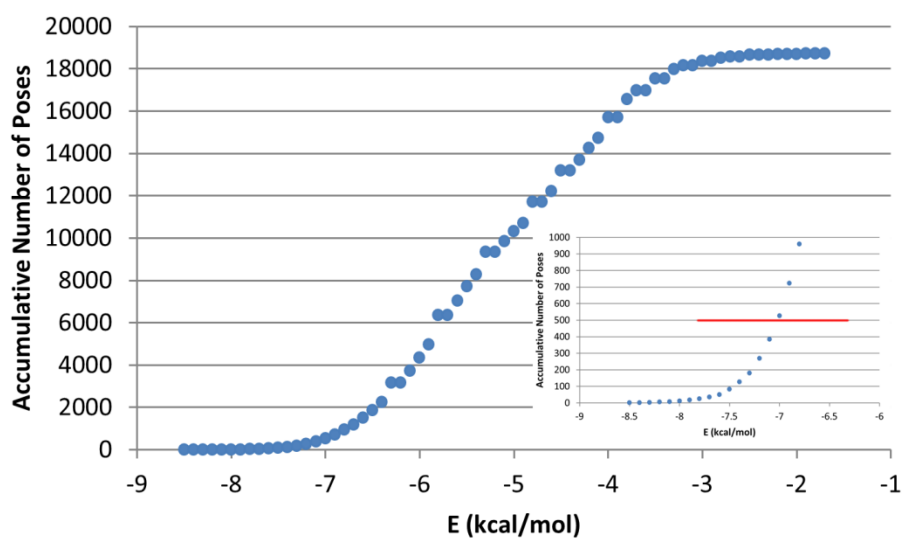

Figure S5. Plot of the accumulative number of structures produced in the docking process versus their binding energy for the most populated cluster identified in the cMD.

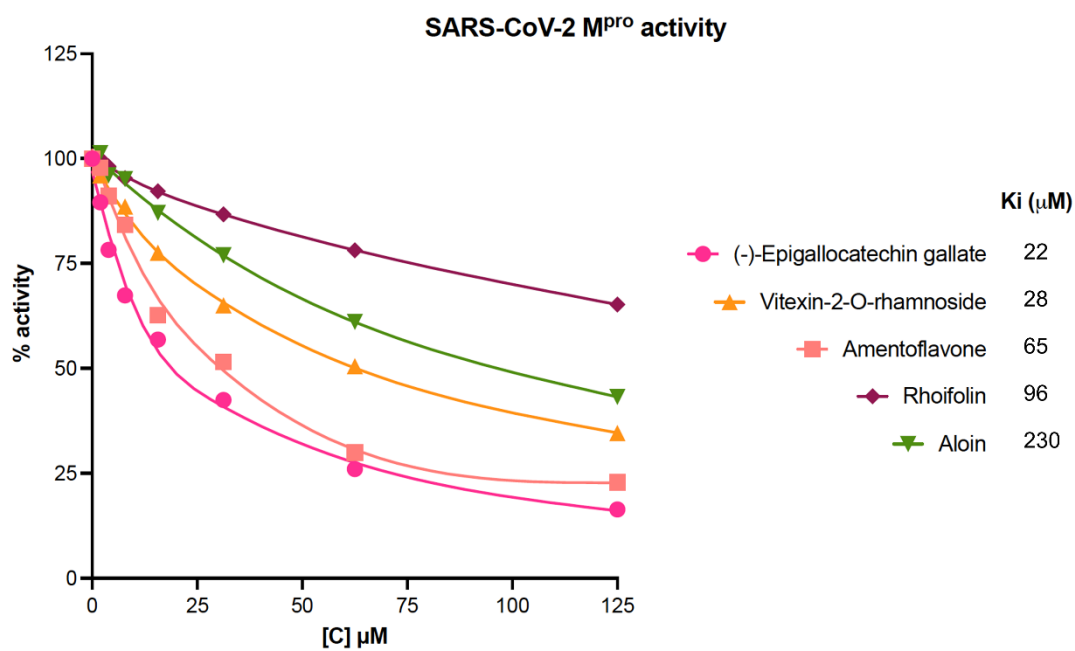

Figure S6. *In vitro* M<sup>pro</sup> inhibitory activity of candidate compounds. Serial dilutions of the indicated compounds were used in a FRET-based activity assay with recombinant SARS-CoV-2 M<sup>pro</sup> and a two-fluorophore substrate amenable to FRET. The substrate concentration-independent inhibition constant for each compound, K<sub>i</sub>, was calculated as described in Materials and Methods. The substrate concentration-dependent IC<sub>50</sub> was calculated by applying a least squares fit to a standard [inhibitor] vs. normalized response curve.

Table S1. Description of the most important hydrogen bonds obtained from the last 100 ns of the 1.5  $\mu$ s MD trajectory.

| System                     | Acceptor   | Donor           | Occupancy (%) |
|----------------------------|------------|-----------------|---------------|
| (-)Epigallocatechin galate | ASP187_OD2 | Ligand_O10-H17  | 100.0         |
|                            | ASP187_O   | Ligand_O1-H8    | 64.8          |
|                            | ASP187_O   | Ligand_O9-H16   | 7.6           |
|                            | ASP187_OD2 | Ligand_O9-H16   | 47.6          |
|                            | GLU166_O   | ligand_O4-H11   | 78.4          |
|                            | HIE164_ND1 | ligand_O8-H15   | 61.2          |
|                            | ASP48_OD2  | ligand_O3-H10   | 51.2          |
|                            | ASP48_OD1  | ligand_O3-H10   | 47.2          |
|                            | ASP48_OD2  | ligand_O2-H9    | 48.6          |
|                            | ASP48_OD1  | ligand_O2-H9    | 46.0          |
| Amentoflavone              | CYS44_O    | ligand_O6-H14   | 100.0         |
|                            | GLU166_OE1 | ligand_O8-H16   | 87.7          |
|                            | GLU166_OE2 | ligand_O8-H16   | 8.5           |
|                            | ligand_O5  | CYS145_N-H      | 63.3          |
|                            | ASN142_OD1 | ligand_O9-H17   | 32.6          |
|                            | ligand_O9  | ASN142_ND2-HD22 | 9.7           |
| Vitexin-2-O-rhaMnoside     | ASP187_O   | ligand_O11-H27  | 44.8          |
|                            | GLU166_OE1 | ligand_O6-H14   | 41.4          |
|                            | GLU166_OE2 | ligand_O6-H14   | 40.9          |
|                            | GLU166_OE2 | ligand_O7-H15   | 37.9          |
|                            | GLU166_OE1 | ligand_O7-H15   | 37.6          |
|                            | Ligand_O12 | THR190_OG1-HG1  | 40.6          |
|                            | Ligand_O13 | THR190_OG1-HG1  | 10.8          |
|                            | Ligand_O8  | CYS145_N-H      | 20.6          |
| Aloin                      | ASP187_O   | ligand_O7-H14   | 95.2          |
|                            | ASP187_O   | ligand_O8-H15   | 85.9          |
|                            | ASP187_OD2 | ligand_O-H3     | 47.1          |
|                            | ASP187_OD1 | ligand_O-H3     | 32.4          |
|                            | ligand_O7  | GLN189_NE2-HE21 | 16.2          |
|                            | ligand_O5  | SER46_OG-HG     | 10.8          |
| Rhoifolin                  | GLU166_OE2 | ligand_O12-H28  | 96.0          |
|                            | GLU166_OE2 | ligand_O11-H27  | 16.1          |
|                            | ligand_O1  | GLN189_NE2-HE22 | 47.0          |
|                            | ligand_O3  | ASN142_ND2-HD22 | 24.2          |
|                            | PRO168_O   | ligand_O13-H29  | 22.8          |
|                            | ASN119_OD1 | ligand_O6-H14   | 13.8          |

All the compounds are >95% pure by HPLC analysis. The chromatograms of the active compounds are shown below: (a) (-) Epigallocatechin gallate; (b) Amentoflavone; (c) Vitexin-2-O-rhamnoside; (d) Aloin; (e) Rhoifolin.

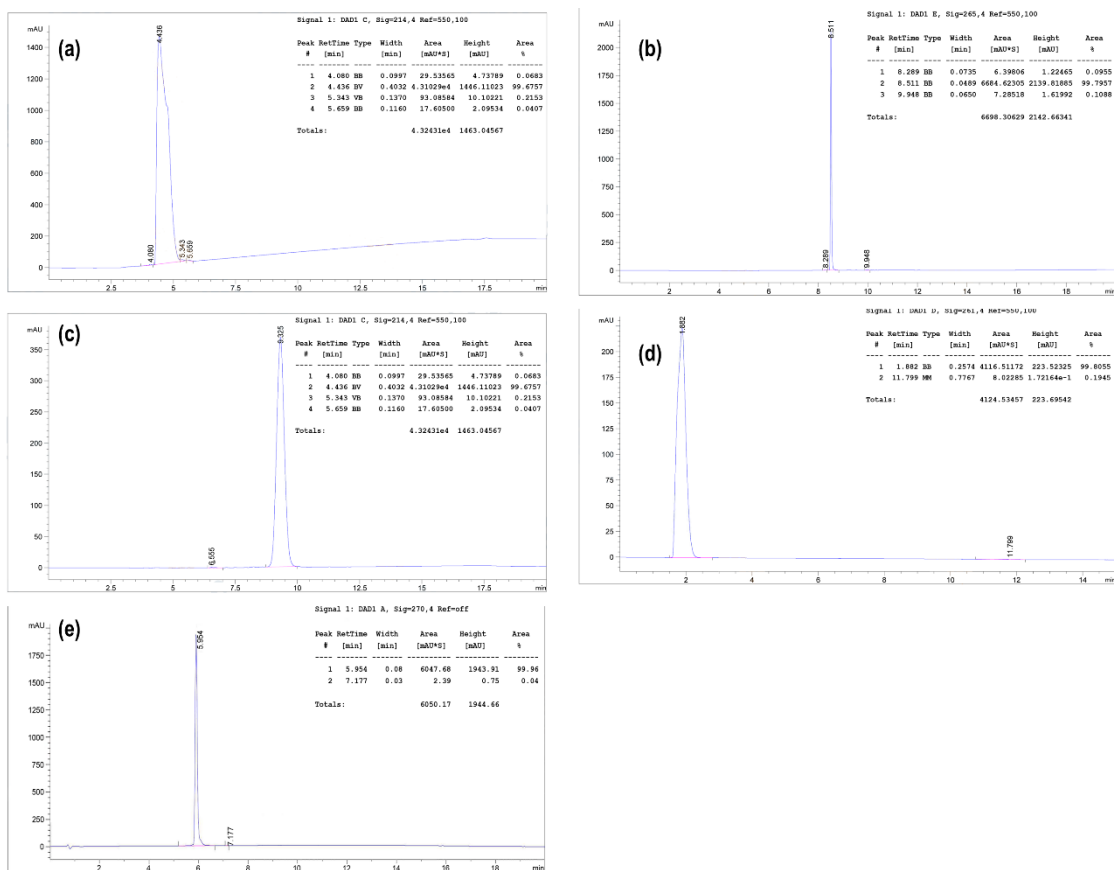

The asymmetric HPLC peak with a right shoulder observed in the epigallocatechin gallate chromatograph was further analyzed by means of mass spectrometry fragmentography experiments. As shown below epigallocatechin gallate is the predominant species (>99.2%) on HPLC. The sharp band, migrating with a peak at 4.4 min, yields epigallocatechin gallate characteristic fragments upon ionization. Epicatechin gallate is a minor species (<0.8%) on HPLC. The band, migrating with a peak at 5.34 min, yields epicatechin gallate characteristic fragments upon ionization. No other species or impurities are detected. We interpret that the shoulder on the original HPLC might have been a consequence of different running conditions that might have prevented a clear separation between epigallocatechin gallate and epicatechin gallate.



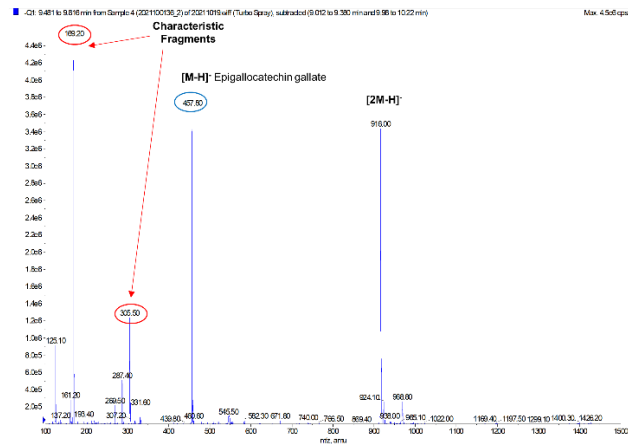

Epigallocatechin gallate: MS peak 4.4 min

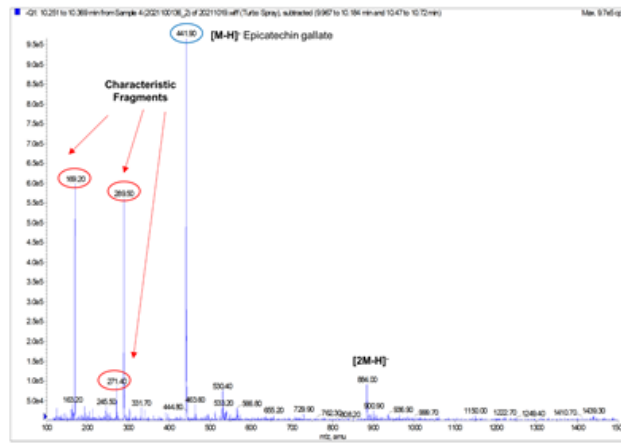

Epigallocatechin gallate: MS peak 5.34 min
